# Supplementary material
Source: PubMed Central journal article supplement (PMC3128765)
Supplement: Supp_Data.pdf [file Supp_Data.pdf]

## Supplementary Data

### Expression Constructs

In all the procedures described below, polymerase chain reaction (PCR) was conducted using LA AccuTaq DNA Polymerase (Sigma-Aldrich). PCR products were first subcloned into pGEM-T Easy plasmid (Promega). After the accuracy of expected PCR products was verified by sequencing, DNA fragments were excised by specific restriction enzymes, and were ligated into other plasmids. All the final constructs were also verified by sequencing. Sequencing reactions were conducted at the University of Hawaii's Advanced Studies in Genomics, Proteomics and Bioinformatics Facility.

#### *Oct4*

The full-length cDNA for mouse *Oct4* (*Pou5f1*) was obtained from P19 EC cell cDNA by reverse transcription (RT)-PCR using the primers (Fw: CCA TGG CTG GAC ACC TGG CTT CAG ACT TCG CCT TC [*NcoI* site underlined]; Rv: GCG GCC GCG TTT GAA TGC ATG GGA GAG CCC AG [*NotI* site underlined]), which was then subcloned into the pEF/myc/cyto plasmid at *NcoI/NotI* restriction enzyme sites.

#### *Oct4-GR*

A DNA fragment encoding the hormone-binding domain of mouse glucocorticoid receptor (Nr3c1) was amplified with the primers (Fw: GCG GCC GCT TCT GAA AAC GCT AAC AAA ACA ATA GTT CC [*NotI* site underlined]; Rv: TCT AGA TCA TTT CTG ATG AAA CAG AAG CTT TTT G [*XbaI* site underlined]) from mouse embryo cDNA, and inserted into the *NotI/XbaI* sites of the *Oct4* expression construct.

#### *Oct4[V267P]*

A DNA fragment was amplified with the primers (Fw: CCA TGG CTG GAC ACC TGG CTT CAG ACT TCG CCT TC [*NcoI* site underlined]; Rv: GCG GCC GCG TTT GAA TGC ATG GGA GAG CCC AG [*NotI* site underlined]) using pCAG-IP-HA267V/P [44] as a template, and subcloned into the pEF/myc/cyto plasmid at *NcoI/NotI* restriction enzyme sites.

#### *Oct4ΔPOU*

Two DNA fragments were separately amplified with the primers (Fw: CCA TGG CTG GAC ACC TGG CTT CAG ACT TCG CCT TC [*NcoI* site underlined]; Rv: CTG AAG GTT CTC ATT GTT CTG GGA CTC CTC GGG AGT), and the primers (Fw: ACT CCC GAG GAG TCC CAG AAC AAT GAG AAC CTT CAG; Rv: GCG GCC GCG TTT GAA TGC ATG GGA GAG CCC AG [*NotI* site underlined]). These two fragments, which overlap in sequence at the ends, were mixed, denatured, and annealed. Using the annealed product as a template, a new DNA fragment was amplified with the primers (Fw: CCA TGG CTG GAC ACC TGG CTT CAG ACT TCG CCT TC [*NcoI* site underlined]; Rv: GCG GCC GCG TTT GAA TGC ATG GGA GAG CCC AG [*NotI* site

underlined]), and subcloned into the pEF/myc/cyto plasmid at *NcoI/NotI* restriction enzyme sites.

#### *Oct4ΔHOM*

Two DNA fragments were separately amplified with the primers (Fw: CCA TGG CTG GAC ACC TGG CTT CAG ACT TCG CCT TC [*NcoI* site underlined]; Rv: TCG TTG GGA ATA CTC AAT CCG GGC CTG CAC CAG GGT), and the primers (Fw: ACC CTG GTG CAG GCC CGG ATT GAG TAT TCC CAA CGA; Rv: GCG GCC GCG TTT GAA TGC ATG GGA GAG CCC AG [*NotI* site underlined]). These two fragments, which overlap in sequence at the ends, were mixed, denatured, and annealed. Using the annealed product as a template, a new DNA fragment was amplified with the primers (Fw: CCA TGG CTG GAC ACC TGG CTT CAG ACT TCG CCT TC [*NcoI* site underlined]; Rv: GCG GCC GCG TTT GAA TGC ATG GGA GAG CCC AG [*NotI* site underlined]), and subcloned into the pEF/myc/cyto plasmid at *NcoI/NotI* restriction enzyme sites.

#### *EnR-Oct4*

A DNA fragment encoding the EnR domain was excised from the pCS2+-EnR plasmid by digesting with *XhoI* (blunted) and *NcoI*, and ligated between the *BamHI* (blunted) and *NcoI* sites of the *Oct4* expression construct.

#### *VP16-Oct4*

A DNA fragment encoding the VP16 domain was amplified with the primers (Fw: GCC CAT GGC CAA GCT ACT GTC TTC TAT C [*NcoI* site underlined]; Rv: CGG GAT CCC CTG GCG ATC CCG GAC CCG G [*BamHI* site underlined]) from pACT plasmid (Promega), and used to replace the sequence between the *NcoI* and *BamHI* sites in the *Oct4* expression construct.

#### *Dkk1*

The full-length cDNA for mouse *Dkk1* was amplified from mouse embryo cDNA using the primers (Fw: CCA TGG TTG TGT GTG CAG CGG CAG CTG TCC GG [*NcoI* site underlined]; Rv: ATT TGC GGC CGC GTG TCT CTG GCA GGT GTG GAG CCT AGA A [*NotI* site underlined]), which was then subcloned into the pEF/myc/cyto plasmid at *NcoI/NotI* restriction enzyme sites.

#### *Gsk3b*

The full-length cDNA for mouse *Gsk3b* was obtained from P19 EC cell cDNA by RT-PCR using the primers (Fw: GTC GAC ATG TCG GGG CGA CCG AGA ACC ACC TCC TTT [*SalI* site underlined]; Rv: GCG GCC GCG GTG GAG TTG GAA GCT GAT GCA GAA GCG GC [*NotI* site underlined]), which was then subcloned into the pEF/myc/cyto plasmid at *SalI/NotI* restriction enzyme sites.

SUPPLEMENTARY TABLE S1. PRIMER SEQUENCES FOR QUANTITATIVE REVERSE  
TRANSCRIPTION-POLYMERASE CHAIN REACTION

| <i>Gene name</i> | <i>Forward primer sequence</i> | <i>Reverse primer sequence</i> |
|------------------|--------------------------------|--------------------------------|
| <i>Actb</i>      | GAGAGGGAAATCGTGCCTGACATC       | CAGCTCAGTAACAGTCCGCCTAGA       |
| <i>Aes</i>       | TCCTGAGCTGAAGTCCATCATCCG       | TCGTGTCGGTTCTTGTCTCCTTG        |
| <i>Apc</i>       | TGGCATTCTGGTTGGCACCCCTCA       | TTGTGTCTCTGCTTACTCCGGTGA       |
| <i>Apc2</i>      | ACACAGGACACAGTGTGACATCCA       | GGTCAAGCACCCAGTGGTTAGTCT       |
| <i>Axin1</i>     | GACAGGCTCAGAGAGTCCGAAGGT       | GGACAGAAGGCAGCTTGTGACTTG       |
| <i>Axin2</i>     | CACCACCACCATCAGCAGTGTTCAT      | GACTTGCTCTGCCGCTCACTCTCT       |
| <i>Brachyury</i> | CCTCGGATTCACATCGTGAGAGTT       | AGTAGGTGGGCTGGCGTTATGACT       |
| <i>Btrc</i>      | ACACTGGAATGCAAGCGGATTCTC       | CAAAGCAGCCATAAGATCCACAC        |
| <i>Cdx2</i>      | CCTCCCGACTTCCCTTCACCATAC       | CCTCCCGACTTCCCTTCACCATAC       |
| <i>Ctnnbip1</i>  | CCCTGGTGATGGTGTGTGCTCTGT       | TGATGCTGCCCTCCCTCCTCGAAT       |
| <i>Cby1</i>      | TAGGGAGGAGACACAGGATGGAAG       | TGCCAGCTGTCTGAATATGGTGAT       |
| <i>Eef1a1</i>    | CTGGCATGGTGGTTACCTTTGCTC       | GGTAGTCAGAGAAGCTCTCAACAC       |
| <i>Eomes</i>     | ATCTCCTAACACTGGCTCCCACTG       | CGTTGGTCTGTGGCACGGTTCTCT       |
| <i>Fgf4</i>      | TACTGCAACGTGGGCATCGGA          | GTGGGTTACCTTCATGGTAGG          |
| <i>Fgf8</i>      | GTTGCAGTTGCTGGTTCTCTGCCT       | AGTCCTTGCCTTTGCCGTTGCTCT       |
| <i>Foxd3</i>     | CTCTGATCCTGGTCCATCTGTCTCT      | GGTGCATTTTTGGAAATTCGGTGA       |
| <i>Gapdh</i>     | GCATGGCCTTCCGTGTTCTCT          | CCCTGTTGCTGTAGCCGTATTTCAT      |
| <i>Gsk3a</i>     | AATCCGAGAGATGAACCCTAACTA       | TTCATTTACCTCTGCCCTCTAGTC       |
| <i>Gsk3b</i>     | AGCCAAGCAGACACTCCCTGTGAT       | GTCTCGCCCATTTGGTAGTTTGAC       |
| <i>Hoxb1</i>     | TCGTGAGAACCAGCACTCTCACT        | TTCTTGGGCAGCTCTAAACTGGTG       |
| <i>Lhx1</i>      | TGCGGCTCACTGTGCTAGTATGTA       | AACACTTTCTCAGGTTGCTGGTGC       |
| <i>Nanog</i>     | CAGAAGCAGAAGTACCTCAGCCTC       | CACCTGGTGGAGTCACAGAGTAGT       |
| <i>Oct4</i>      | AGGCAGGAGCACGAGTGGAAAGCA       | GGAGGGCTTCGGGCACTTCAGAAA       |
| <i>Snai1</i>     | CCGTCCAGCTGTAACCATGCCTCA       | TGGGAGACACATTGGCCAGGCTGA       |
| <i>Sp5</i>       | CAGGACAGGAAACTGGGTCGTAGT       | GGCCTAGCAAAAACCTTAGGCCTTG      |
| <i>Tax1bp3</i>   | CCAGAGACAGTATGAAGCCCACCT       | TGGCTTGGTCACATGCTACAAGTT       |
| <i>Tbx6</i>      | GGCCTCTCTTCCACCTTTAGTTC        | CACTAGTAACAAGGCCCCCAGGAG       |
| <i>Tle1</i>      | TCCTCCTCCTCATGAGAGTACC         | GCAGCATGAGAAGCAGACCTTGGA       |
| <i>Tle2</i>      | AACCGAGACAACACTACATCCGCTCC     | CAGGAAGCGAACTTGAGTGACAGC       |
| <i>Tle3</i>      | GACAACTACATCCGCTCGTGCAAG       | CGTCCTCCAGGCATTGAGAAGGTT       |
| <i>Tle4</i>      | TCCAAGGTCGTCTTCTCATGCTGC       | TGTCACAGCTAAGCACCCGATGAGG      |
| <i>Tle6</i>      | GTGGATAACAACCTACCTGGCGTGA      | TGTCCTTGGTGTCCACAGTGAGCA       |
| <i>Wnt3</i>      | CAGATGCCCGCTCAGCTATGAACA       | AGCAGCACCAAGTGGAAAGACGCAAT     |
| <i>Wnt3a</i>     | GCCACAAGAGCTTCTGATTGGTA        | CCAGGCAGAAGACAGTCAGTCACC       |
